# Supplementary material
Source: PubMed Central journal article supplement (PMC4565786)
Supplement: NIHMS654370-supplement-3.pdf [file NIHMS654370-supplement-3.pdf]

| AutDB Information |                                                                                                  |                                                         |      |       |      |      |       |                                                             | <i>Pten</i> <sup>m3m4/m3m4</sup><br>(6-weeks) |         | <i>Pten</i> <sup>m3m4/m3m4</sup><br>(2-weeks) |         |
|-------------------|--------------------------------------------------------------------------------------------------|---------------------------------------------------------|------|-------|------|------|-------|-------------------------------------------------------------|-----------------------------------------------|---------|-----------------------------------------------|---------|
| Human Gene        | Name                                                                                             | Alteration in ASD                                       | Del. | Miss. | Non. | SNPs | Other | Primary Reference                                           | Fold Change                                   | q-value | Fold Change                                   | q-value |
| ADCY5             | Adenylate cyclase 5                                                                              | Rare Single Gene variant                                | x    | x     |      |      |       | O'Roak BJ, <i>Nature</i> , 2012                             | -0.3654                                       | 0.01572 |                                               |         |
| AGMO              | alkylglycerol monooxygenase                                                                      | Genetic Association                                     | x    | x     |      |      |       | Sebat J, <i>Science</i> , 2007                              | 0.5013                                        | 0.04203 |                                               |         |
| AHI1              | Abelson helper integration site 1                                                                | Rare Single Gene variant                                | x    | x     | x    | x    |       | Alvarez Retuerto AI, <i>Hum Mol Genet</i> , 2008            | -0.6483                                       | 0.00136 |                                               |         |
| ARHGAP15          | Rho GTPase activating protein 15                                                                 | Rare Single Gene variant                                | x    |       |      |      | x     | O'Roak BJ, <i>Nat Genet</i> , 2011                          | -0.5287                                       | 0.00347 |                                               |         |
| CADPS2            | Ca2+-dependent activator protein for secretion 2                                                 | Rare Single Gene variant                                | x    | x     |      |      | x     | Cisternas FA, <i>Genomics</i> , 2003                        | -0.3246                                       | 0.04863 |                                               |         |
| CELF6             | CUGBP, Elav-like family member 6                                                                 | Genetic association/Rare single gene variant/Functional | x    |       |      |      |       | Dougherty JD, <i>J Neurosci</i> , 2013                      | -0.4651                                       | 0.02542 |                                               |         |
| CHD2              | Chromodomain helicase DNA binding protein 2                                                      | Multigenic CNV                                          | x    | x     | x    |      | x     | Carvill GL, <i>Nat Genet</i> , 2013                         | -0.3741                                       | 0.03897 |                                               |         |
| CHRN3             | Cholinergic receptor, nicotinic, beta 3 (neuronal)                                               | Rare single gene variant                                | x    |       |      |      | x     | Prasad A, <i>G3 (Bethesda)</i> , 2012                       | -0.9624                                       | 0.04638 |                                               |         |
| CNTN5             | Contactin 5                                                                                      | Rare single gene variant                                | x    | x     |      |      | x     | van Dallen E, <i>Neurogenetics</i> , 2011                   | -0.5329                                       | 0.00136 |                                               |         |
| CNTNAP2           | contactin associated protein-like 2                                                              | Syndromic                                               | x    | x     | x    | x    | x     | Arking DE, <i>Am J Hum Genet</i> , 2008                     | -0.3408                                       | 0.03711 |                                               |         |
| CREBBP            | CREB binding protein                                                                             | Syndromic                                               | x    | x     | x    | x    | x     | Barnby G, <i>Am J Hum Genet</i> , 2005                      | -0.324                                        | 0.0499  |                                               |         |
| CTTNBP2           | cortactin binding protein 2                                                                      | Rare Single Gene variant                                | x    | x     |      |      | x     | Cheung J, <i>Genomics</i> , 2001                            | -0.4045                                       | 0.00531 |                                               |         |
| DHCR7             | 7-dehydrocholesterol reductase                                                                   | Syndromic                                               | x    | x     | x    |      | x     | Tierney E, <i>Am J Med Genet</i> , 2001                     | 0.8177                                        | 0.00136 |                                               |         |
| DMD               | dystrophin (muscular dystrophy, Duchenne and Becker types)                                       | Genetic Association                                     | x    | x     |      | x    | x     | Wu JY, <i>J Child Neurol</i> , 2005                         | -0.3719                                       | 0.01144 |                                               |         |
| DOCK10            | Dedicator of cytokinesis 10                                                                      | Rare single gene variant                                | x    | x     |      |      |       | Nava C, <i>Eur J Hum Genet</i> , 2014                       | 0.529                                         | 0.00136 | 0.5373                                        | 0.00686 |
| FOXP1             | Forkhead box G1                                                                                  | Syndromic                                               | x    | x     | x    |      | x     | Kortüm F, <i>J Med Genet</i> , 2011                         | -0.4098                                       | 0.03083 |                                               |         |
| FOXP1             | forkhead box P1                                                                                  | Rare Single Gene variant                                | x    | x     | x    | x    |       | O'Roak BJ, <i>Nat Genet</i> , 2011                          | -0.3906                                       | 0.00706 |                                               |         |
| FOXP2             | forkhead box P2                                                                                  | Rare single gene variant                                | x    | x     | x    | x    | x     | Gong X, <i>Am J Med Genet B Neuropsychiatr Genet</i> , 2004 | -1.0191                                       | 0.00136 | -0.4315                                       | 0.03566 |
| GALNT13           | UDP-N-acetyl-alpha-D-galactosamine:polypeptide N-acetylgalactosaminyltransferase 13 (GalNAc-T13) | Rare Single Gene variant                                | x    |       |      |      |       | Bucan M, <i>PLoS Genet</i> , 2009                           | -0.4285                                       | 0.00444 |                                               |         |
| GPR37             | G protein-coupled receptor 37 (endothelin receptor type B-like)                                  | Rare single gene variant                                | x    | x     |      | x    | x     | Fujita-Jimbo E, <i>PLoS One</i> , 2012                      | 0.5242                                        | 0.00136 |                                               |         |
| GRIK2             | glutamate receptor, ionotropic, kainate 2                                                        | Genetic Association                                     | x    | x     |      | x    | x     | Jamain S, <i>Mol Psychiatry</i> , 2002                      | -0.5314                                       | 0.00136 |                                               |         |
| HEPACAM           | hepatic and glial cell adhesion molecule                                                         | Rare Single Gene variant                                | x    | x     | x    |      |       | López-Hernández T, <i>Am J Hum Genet</i> , 2011             | 0.4332                                        | 0.00621 |                                               |         |

|          |                                                                                                          |                                               |   |   |   |   |   |                                                        |         |         |         |         |
|----------|----------------------------------------------------------------------------------------------------------|-----------------------------------------------|---|---|---|---|---|--------------------------------------------------------|---------|---------|---------|---------|
| IL1RAPL1 | interleukin 1 receptor accessory protein-like 1                                                          | Rare single gene variant                      | x | x |   |   | x | Bhat SS, <i>Clin Genet</i> , 2008                      | -0.4019 | 0.012   |         |         |
| KANK1    | KN motif and ankyrin repeat domains 1                                                                    | Rare single gene variant                      | x | x |   |   | x | Vanzo RJ, <i>Eur J Med Genet</i> , 2013                | 0.586   | 0.00136 |         |         |
| LAMC3    | laminin, gamma 3                                                                                         | Rare Single Gene variant                      | x | x | x |   | x | O'Roak BJ, <i>Nat Genet</i> , 2011                     | 0.6     | 0.00706 |         |         |
| NELL1    | NEL-like 1 (chicken)                                                                                     | Genetic association                           | x |   |   | x |   | Connolly JJ, <i>Child Dev</i> , 2013                   | -0.3861 | 0.00782 |         |         |
| PCDH15   | Protocadherin-related 15                                                                                 | Genetic association                           | x |   |   | x |   | Anney R, <i>Hum Mol Genet</i> , 2012                   | 0.6366  | 0.00136 |         |         |
| PTCHD1   | patched domain containing 1                                                                              | Rare Single Gene variant                      | x | x |   |   |   | Marshall CR, <i>Am J Hum Genet</i> , 2008              | -0.3496 | 0.04924 |         |         |
| SLC16A3  | solute carrier family 16, member 3 (monocarboxylic acid transporter 4)                                   | Rare Single Gene variant                      | x |   |   |   | x | Pinto D, <i>Nature</i> , 2010                          | 0.9118  | 0.00621 |         |         |
| SYN2     | Synapsin II                                                                                              | Genetic association                           | x | x |   |   |   | Fassio A, <i>Hum Mol Genet</i> , 2011                  | 0.4011  | 0.01572 |         |         |
| ADORA2A  | adenosine A2a receptor                                                                                   | Syndromic                                     |   |   |   | x |   | Freitag CM, <i>Eur Child Adolesc Psychiatry</i> , 2010 | -1.3121 | 0.00136 |         |         |
| ARNT2    | aryl-hydrocarbon receptor nuclear translocator 2                                                         | Syndromic                                     |   | x |   | x | x | Chakrabarti B, <i>Autism Res</i> , 2009                | -0.5197 | 0.00136 |         |         |
| CD44     | CD44 molecule (Indian blood group)                                                                       | Genetic Association                           |   |   |   |   | x | Hu VW, <i>BMC Genomics</i> , 2006                      | 0.7537  | 0.00247 |         |         |
| CDH9     | cadherin 9, type 2 (T1-cadherin)                                                                         | Genetic Association                           |   |   |   | x |   | Wang K, <i>Nature</i> , 2009                           | -0.5571 | 0.00136 |         |         |
| CNTNAP3  | contactin associated protein-like 3                                                                      | Rare Single Gene variant                      |   | x |   |   |   | Vaags AK, <i>Am J Hum Genet</i> , 2012                 | -1.0654 | 0.00136 |         |         |
| DCX      | doublecortex, lissencephaly, X-linked (doublecortin)                                                     | Rare Single Gene variant                      |   | x | x |   | x | Vourc'h P, <i>Am J Med Genet</i> , 2002                | -0.5902 | 0.00136 |         |         |
| DLX1     | distal-less homeobox 1                                                                                   | Genetic Association                           |   |   |   | x |   | Liu X, <i>Eur J Hum Genet</i> , 2009                   | -0.7585 | 0.01572 |         |         |
| DRD2     | Dopamine receptor D2                                                                                     | Rare single gene variant                      |   | x |   | x |   | Hettinger JA, <i>Behav Brain Funct</i> , 2012          | -2.6216 | 0.00136 |         |         |
| EGR2     | early growth response 2 (Krox-20 homolog, Drosophila)                                                    | Genetic Association                           |   |   |   | x |   | Hu VW, <i>BMC Genomics</i> , 2006                      | -0.8403 | 0.00136 |         |         |
| F13A1    | coagulation factor XIII, A1 polypeptide                                                                  | Genetic Association                           |   |   |   |   | x | Hu VW, <i>BMC Genomics</i> , 2006                      | 0.848   | 0.00247 |         |         |
| FABP5    | fatty acid binding protein 5 (psoriasis-associated)                                                      | Rare Single Gene variant, Genetic Association |   | x |   |   | x | Maekawa M, <i>J Hum Genet</i> , 2010                   | 0.4024  | 0.02893 |         |         |
| FABP7    | fatty acid binding protein 7, brain                                                                      | Genetic Association                           |   | x |   | x | x | Maekawa M, <i>J Hum Genet</i> , 2010                   | 1.0106  | 0.00136 |         |         |
| FLT1     | fms-related tyrosine kinase 1 (vascular endothelial growth factor/vascular permeability factor receptor) | Genetic Association                           |   |   |   | x |   | Hu VW, <i>BMC Genomics</i> , 2006                      | 0.3697  | 0.02651 |         |         |
| FRMPD4   | FERM and PDZ domain containing 4                                                                         | Rare Single Gene variant                      |   | x |   |   |   | Piton A, <i>Mol Psychiatry</i> , 2011                  | -0.3411 | 0.02491 |         |         |
| GLO1     | glyoxalase I                                                                                             | Genetic Association                           |   |   |   | x |   | Junaid MA, <i>Am J Med Genet A</i> , 2004              | 0.8257  | 0.00136 | -0.4801 | 0.01905 |
| GLRA2    | glycine receptor, alpha 2                                                                                | Rare Single Gene variant                      |   | x |   |   |   | Piton A, <i>Mol Psychiatry</i> , 2011                  | -0.6646 | 0.00136 |         |         |
| GSN      | Gelsolin                                                                                                 | Rare single gene variant                      |   |   |   |   | x | Awadalla P, <i>Am J Hum Genet</i> , 2010               | 1.2159  | 0.00136 | 0.9807  | 0.00374 |

|          |                                                                                               |                                |  |   |   |   |           |                                             |         |         |        |         |
|----------|-----------------------------------------------------------------------------------------------|--------------------------------|--|---|---|---|-----------|---------------------------------------------|---------|---------|--------|---------|
| HS3ST5   | heparan sulfate (glucosamine) 3-O-sulfotransferase 5                                          | Genetic Association            |  |   |   | x |           | Wang K, <i>Nature</i> , 2009                | -0.5679 | 0.0197  |        |         |
| HTR1B    | 5-hydroxytryptamine (serotonin) receptor 1B                                                   | Genetic Association            |  | x |   | x |           | Orabona GM, <i>Brain Res</i> , 2009         | -0.8468 | 0.03487 |        |         |
| KCND2    | Potassium voltage-gated channel, Shal-related subfamily, member 2                             | Rare single gene variant       |  | x |   | x | x         | Connolly JJ, <i>Child Dev</i> , 2013        | -0.3887 | 0.00782 |        |         |
| KCNJ10   | Potassium inwardly-rectifying channel, subfamily J, member 10                                 | Genetic Association            |  | x |   | x |           | Sicca F, <i>Neurobiol Dis</i> , 2011        | 0.5056  | 0.00136 | 0.5438 | 0.00374 |
| MSN      | Moesin                                                                                        | Functional                     |  |   |   |   | ncRNA     | Kerin T, <i>Sci Transl Med</i> , 2012       | 0.6059  | 0.00136 | 0.487  | 0.04256 |
| NBEA     | neurobeachin                                                                                  | Rare single gene variant       |  |   |   |   | x         | Castermans D, <i>J Med Genet</i> , 2003     | -0.3281 | 0.0475  |        |         |
| NEFL     | Neurofilament, light polypeptide                                                              | Genetic association/functional |  |   |   | x |           | Anitha A, <i>Mol Autism</i> , 2012          | 0.62    | 0.00136 |        |         |
| PER1     | period homolog 1 (Drosophila)                                                                 | Genetic Association            |  | x |   | x |           | Nicholas B, <i>Mol Psychiatry</i> , 2007    | -0.6362 | 0.00136 |        |         |
| PIK3CG   | phosphoinositide-3-kinase, catalytic, gamma polypeptide                                       | Genetic Association            |  |   |   | x |           | Serajee FJ, <i>J Med Genet</i> , 2003       | 0.687   | 0.02142 |        |         |
| PTGS2    | prostaglandin-endoperoxide synthase 2 (prostaglandin G/H synthase and cyclooxygenase)         | Genetic Association            |  |   |   | x |           | Yoo HJ, <i>Neurosci Res</i> , 2008          | 0.7714  | 0.00136 |        |         |
| REEP3    | receptor accessory protein 3                                                                  | Rare single gene variant       |  |   |   |   | x         | Castermans D, <i>Eur J Hum Genet</i> , 2007 | 0.5473  | 0.00136 |        |         |
| RELN     | Reelin                                                                                        | Genetic Association            |  | x | x | x | x         | Persico AM, <i>Mol Psychiatry</i> , 2001    | -0.4139 | 0.00706 |        |         |
| SERPINE1 | Serpin peptidase inhibitor, clade E (nexin, plasminogen activator inhibitor type 1), member 1 | Genetic association            |  |   |   | x |           | Campbell DB, <i>Autism Res</i> , 2008       | 1.0912  | 0.012   |        |         |
| SYT17    | synaptotagmin XVII                                                                            | Genetic Association            |  |   |   | x |           | Wang K, <i>Nature</i> , 2009                | -0.4297 | 0.02893 |        |         |
| TH       | tyrosine hydroxylase                                                                          | Genetic Association            |  |   |   |   | no assoc. | Comings DE, <i>Biol Psychiatry</i> , 1995   | -2.3039 | 0.00136 |        |         |
